# Supplementary material for: Promoting effect of rapamycin on osteogenic differentiation of maxillary sinus membrane stem cells
Source: PeerJ. 2021 Jun 1;9:e11513. doi: 10.7717/peerj.11513 (PMC8176927; doi:10.7717/peerj.11513)
Supplement: Supplemental Information 1 [file peerj-09-11513-s001.xlsx]

## Sheet: Sheet1
LC3(7d)	CP		LC3(7d)	CP		LC3(7d)	CP			Becn1(7d)	CP		Becn1(7d)	CP		Becn1(7d)	CP			Col1a1(7d)	CP		Col1a1(7d)	CP		Col1a1(7d)	CP			Ibsp(7d)	CP		Ibsp(7d)	CP		Ibsp(7d)	CP			Runx2(7d)	CP		Runx2(7d)	CP		Runx2(7d)	CP
0nM RAPAmycin	29.1		0nM RAPAmycin	29.78		0nM RAPAmycin	29.19			0nM RAPAmycin	24.21		0nM RAPAmycin	24.02		0nM RAPAmycin	24.75			0nM RAPAmycin	29.1		0nM RAPAmycin	29.49		0nM RAPAmycin	29.44			0nM Rapamycin	34		0nM Rapamycin	33.43		0nM Rapamycin	33.76			0nM RAPAmycin	24.54		0nM RAPAmycin	24.27		0nM RAPAmycin	24.64
	29.9			29.78			29.57				24.54			24.38			24.22				29.44			29.34			29.35				33.45			33.23			33.58				24.8			24.24			24.17
	29.21			29.99			29.87				24.48			24.52			24.76				29.56			29.43			29.91				33.65			33.66			33.42				24.59			24.65			24.88
10nM RAPAmycin	24.77		10nM RAPAmycin	24.51		10nM RAPAmycin	25.02			10nM RAPAmycin	21.63		10nM RAPAmycin	21.8		10nM RAPAmycin	21.82			10nM RAPAmycin	26.14		10nM RAPAmycin	26.83		10nM RAPAmycin	26.76			10nM Rapamycin	32.53		10nM Rapamycin	32.72		10nM Rapamycin	32.9			10nM RAPAmycin	22.1		10nM RAPAmycin	22.52		10nM RAPAmycin	22.67
	24.09			24.98			25.56				21.11			21.6			21.43				26.27			26.8			26.13				32.63			32.35			32.57				22.6			22.72			22.1
	24.17			25.08			25.68				21.6			21.78			21.93				26.93			26.11			26.82				32.93			32.03			32.42				22.13			22.04			23
100nM RAPAmycin	21.07		100nM RAPAmycin	21.92		100nM RAPAmycin	21.42			100nM RAPAmycin	19.16		100nM RAPAmycin	19.91		100nM RAPAmycin	19.86			100nM RAPAmycin	23.22		100nM RAPAmycin	23.36		100nM RAPAmycin	23.04			100nM Rapamycin	32.53		100nM Rapamycin	33.13		100nM Rapamycin	32.19			100nM RAPAmycin	20.84		100nM RAPAmycin	20.59		100nM RAPAmycin	20.69
	21.28			21.84			21.95				19.41			19.94			19.52				23.16			23.3			23.69				32.24			33.14			32.98				20.38			20.71			20.74
	21.17			21.77			21.25				19.19			19.46			19.28				23.07			23.76			23.91				32.96			33.6			33.42				20.79			20.74			20.26
1000nM RAPAmycin	19.94		1000nM RAPAmycin	19.92		1000nM RAPAmycin	19.82			1000nM RAPAmycin	15.05		1000nM RAPAmycin	15.32		1000nM RAPAmycin	15.48			1000nM RAPAmycin	26.02		1000nM RAPAmycin	26.16		1000nM RAPAmycin	26.1			1000nM Rapamycin	33.87		1000nM Rapamycin	33.78		1000nM Rapamycin	33.8			1000nM RAPAmycin	26.64		100nM RAPAmycin	26.97		1000nM RAPAmycin	26.77
	19.67			19.94			19.95				15.27			15.29			15.14				26.74			26.12			26.02				33.22			33.14			33.84				26.9			26.37			26.84
	19.94			19.97			19.75				15.46			15.78			15.54				26.8			26.77			26.94				33.7			33.34			33.88				26.36			26.19			26.76
LC3(14d)	CP		LC3(14d)	CP		LC3(14d)	CP			Becn1(14d)	CP		Becn1(14d)	CP		Becn1(14d)	CP			Col1a1(14d)	CP		Col1a1(14d)	CP		Col1a1(14d)	CP			Ibsp(14d)	CP		Ibsp(14d)	CP		Ibsp(14d)	CP			Runx2(14d)	CP		Runx2(14d)	CP		Runx2(14d)	CP
0nM RAPAmycin	29.06		0nM RAPAmycin	29.63		0nM RAPAmycin	29.92			0nM RAPAmycin	23.28		0nM RAPAmycin	23.88		0nM RAPAmycin	23.9			0nM RAPAmycin	23.53		0nM RAPAmycin	23.65		0nM RAPAmycin	23.02			0nM Rapamycin	32.95		0nM Rapamycin	32.44		0nM Rapamycin	32.05			0nM RAPAmycin	21.92		0nM RAPAmycin	21.48		0nM RAPAmycin	21.52
	29.22			29.03			29.43				23.98			23.29			23.08				23.65			23.44			23.45				32.72			32.39			32.85				21.93			21.23			21.55
	29.55			29.72			29.51				23.49			23.2			23.68				23.45			23.56			23.81				32.05			32.85			32.33				21.52			21.68			21.95
10nM RAPAmycin	26.91		10nM RAPAmycin	26.9		10nM RAPAmycin	26.87			10nM RAPAmycin	20.93		10nM RAPAmycin	20.43		10nM RAPAmycin	20			10nM RAPAmycin	21.78		10nM RAPAmycin	21.52		10nM RAPAmycin	21.22			10nM Rapamycin	31.64		10nM Rapamycin	31.19		10nM Rapamycin	31.8			10nM RAPAmycin	20.44		10nM RAPAmycin	20.05		10nM RAPAmycin	20.31
	26.83			26.85			26.95				20.82			20.83			20.15				21.65			21.64			21.61				31.69			31.8			31.6				20.08			20.81			20.73
	26.94			26.93			26.98				20.03			20.02			20.25				21.94			21.37			21.96				31.97			31.13			31.98				20.73			20.41			20.26
100nM RAPAmycin	26.13		100nM RAPAmycin	26.72		100nM RAPAmycin	26.3			100nM RAPAmycin	18.73		100nM RAPAmycin	18.86		100nM RAPAmycin	18.67			100nM RAPAmycin	18.26		100nM RAPAmycin	18.63		100nM RAPAmycin	18.23			100nM Rapamycin	30.66		100nM Rapamycin	31.07		100nM Rapamycin	30.64			100nM RAPAmycin	18.34		100nM RAPAmycin	18.26		100nM RAPAmycin	18.85
	26.36			26.59			26.18				18.76			18.89			18.92				18.55			18.99			18.14				31			30.97			31.83				18.78			18.37			19
	26.01			26.11			26.42				18.32			18.12			18.31				18.74			18.68			18.99				30.07			31.17			31.22				18.58			18.94			18.66
1000nM RAPAmycin	25.75		1000nM RAPAmycin	25.19		1000nM RAPAmycin	25.21			1000nM RAPAmycin	16.23		1000nM RAPAmycin	16.95		1000nM RAPAmycin	16.33			1000nM RAPAmycin	20.58		1000nM RAPAmycin	20.84		1000nM RAPAmycin	20.29			1000nM Rapamycin	31.8		1000nM Rapamycin	31.18		1000nM Rapamycin	31.81			1000nM RAPAmycin	22.97		1000nM RAPAmycin	22.55		1000nM RAPAmycin	22.59
	25.55			25.92			25.13				16.62			16.95			16.63				20.98			20.27			20.95				31.3			31.53			31.99				22.35			22.83			22.21
	25.02			25.86			25.16				16.28			16.7			16				20.96			20.53			20.91				31.31			31.79			31.32				22.43			22.56			22.87
LC3(21d)	CP		LC3(21d)	CP		LC3(21d)	CP			Becn1(21d)	CP		Becn1(21d)	CP		Becn1(21d)	CP			Col1a1(21d)	CP		Col1a1(21d)	CP		Col1a1(21d)	CP			Ibsp(21d)	CP		Ibsp(21d)	CP		Ibsp(21d)	CP			Runx2(21d)	CP		Runx2(21d)	CP		Runx2(21d)	CP
0nM RAPAmycin	28.23		0nM RAPAmycin	28.79		0nM RAPAmycin	28.99			0nM RAPAmycin	23.77		0nM RAPAmycin	23.9		0nM RAPAmycin	23.41			0nM RAPAmycin	19.81		0nM RAPAmycin	19.95		0nM RAPAmycin	19.7			0nM Rapamycin	25.44		0nM Rapamycin	25.99		0nM Rapamycin	25.29			0nM RAPAmycin	18.01		0nM RAPAmycin	18.04		0nM RAPAmycin	18.18
	28.93			28.92			28.43				23.04			23.83			23.12				19.73			19.45			19.4				25.4			25.84			25.7				18.25			18.14			18.28
	28.95			28.95			28.86				23.29			23.45			23.44				19.26			19.83			19.24				25.42			25.62			25.47				18.24			18.19			18.2
10nM RAPAmycin	26.74		10nM RAPAmycin	26.79		10nM RAPAmycin	26.81			10nM RAPAmycin	20.51		10nM RAPAmycin	20.67		10nM RAPAmycin	20.28			10nM RAPAmycin	17.96		10nM RAPAmycin	17.57		10nM RAPAmycin	17.82			10nM Rapamycin	24.84		10nM Rapamycin	24.65		10nM Rapamycin	24.84			10nM RAPAmycin	17.67		10nM RAPAmycin	17.16		10nM RAPAmycin	17.92
	26.96			26.71			26.92				20.14			20.55			20.94				17.83			17.7			17.09				24.79			24.16			24.91				17.95			17.05			17.19
	26.88			26.86			26.85				20.47			20.93			20.03				17.23			17.45			17.43				24.02			24.4			24.47				17.73			17.56			17.34
100nM RAPAmycin	27		100nM RAPAmycin	26.61		100nM RAPAmycin	26.39			100nM RAPAmycin	19.97		100nM RAPAmycin	19.45		100nM RAPAmycin	19.64			100nM RAPAmycin	16.79		100nM RAPAmycin	16.7		100nM RAPAmycin	16.89			100nM Rapamycin	20.48		100nM Rapamycin	20.21		100nM Rapamycin	20.18			100nM RAPAmycin	16.03		100nM RAPAmycin	16.92		100nM RAPAmycin	16.5
	26.08			26.47			26.29				19.48			19.29			19.59				16.7			16.23			16.54				20.48			20.26			20.47				16.59			16.34			16.04
	26.05			26.97			26.86				19.77			19.25			19.24				16.99			16.9			16.63				20.08			20.79			20.62				16.13			16.64			16.57
1000nM RAPAmycin	26.35		1000nM RAPAmycin	26.14		1000nM RAPAmycin	26.32			1000nM RAPAmycin	18.17		1000nM RAPAmycin	18.41		1000nM RAPAmycin	18.89			1000nM RAPAmycin	18.1		1000nM RAPAmycin	18.01		1000nM RAPAmycin	18.46			1000nM Rapamycin	21.75		1000nM Rapamycin	21.5		1000nM Rapamycin	21.93			1000nM RAPAmycin	17.6		1000nM RAPAmycin	17.48		1000nM RAPAmycin	17.48
	26.14			26.25			26.2				18.95			18.91			18.22				18.64			18.64			18.45				21.91			21.06			21.63				17.03			17.01			17.35
	26.09			26.75			26.67				18.86			18.44			18.44				18.07			18.61			18.55				21.73			21.1			21.06				17.17			17.2			17.22
[truncated: 6 more columns]
